# Supplementary material for: An immunoproteomic approach revealing peptides from Sporothrix brasiliensis that induce a cellular immune response in subcutaneous sporotrichosis
Source: PubMed Central journal article supplement (PMC5843658; doi:10.1038/s41598-018-22709-8), 2018-03-08
Supplement: 41598_2018_22709_MOESM1_ESM.pdf [file 41598_2018_22709_MOESM1_ESM.pdf]

# **An immunoproteomic approach revealing peptides from *Sporothrix brasiliensis* that induce a cellular immune response in subcutaneous sporotrichosis**

José Roberto Fogaça de Almeida,<sup>1</sup> Grasielle Pereira Jannuzzi,<sup>1</sup> Gilberto Hideo Kaihama,<sup>2</sup> Leandro Carvalho Dantas Breda,<sup>3</sup> Karen Spadari Ferreira,<sup>4</sup> Sandro Rogério de Almeida<sup>1\*</sup>

<sup>1</sup> Faculty of Pharmaceutical Sciences, Department of Clinical and Toxicological Analysis, University of Sao Paulo, Sao Paulo, Brazil

<sup>2</sup> Institute of Chemistry, Department of Biochemistry, University of Sao Paulo, Sao Paulo, Brazil

<sup>3</sup> Department of Immunology, Institute of Biomedical Sciences, University of São Paulo, São Paulo, Brazil.

<sup>4</sup> Department of Biological Sciences, Institute of Environmental, Chemical and Pharmaceutical Sciences, Federal University of São Paulo, Diadema, Brazil.

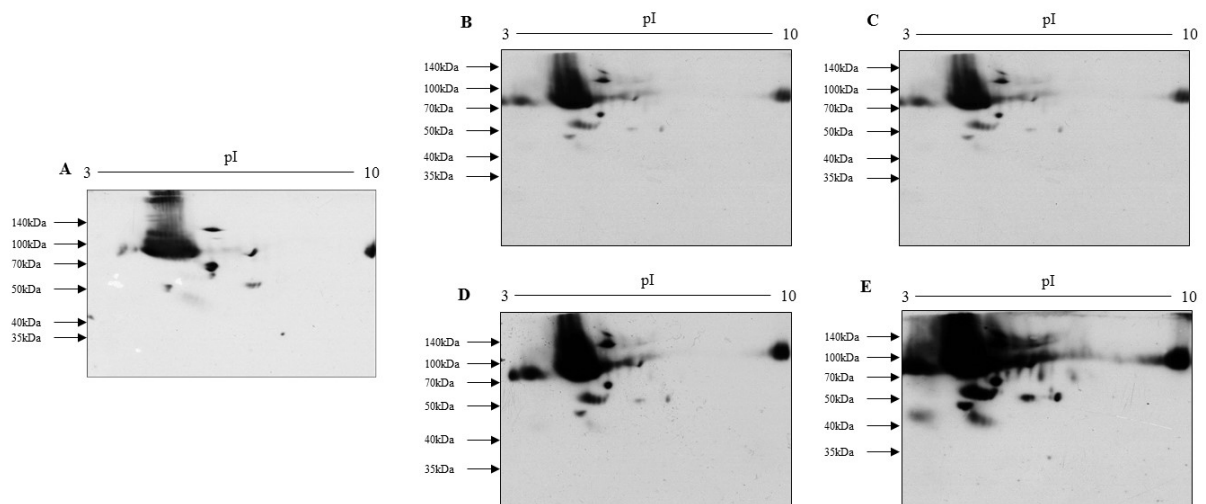

**Supplementary figure 1. The multiple exposure of *S. brasiliensis* proteome western blot. (A)** Proteome of *S. brasiliensis* 5110 (ATCC MYA 4823). The fungus proteins were fractionated using 7 cm pH 3–10 (left to right) strips in the first dimension and 12% SDS-PAGE gels in the second dimension, the spots recognized by western blot with sera from mice infected by *S. brasiliensis*. **(B-E)** Different overexposure of the western blot with sera from mice infected by *S. brasiliensis*.

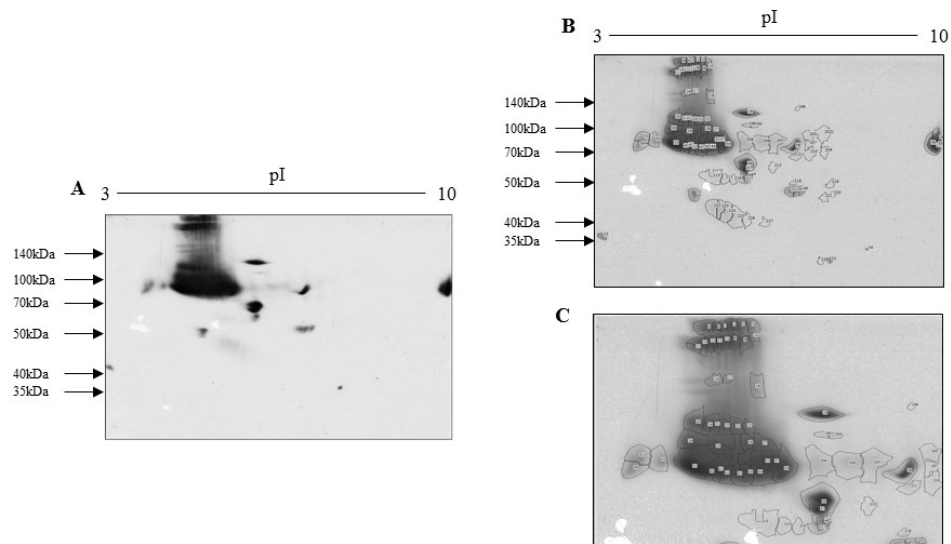

**Supplementary figure 2. *S. brasiliensis* proteome western blot analyzed by ImageMaster 2D Platinum 7.0.** (A) Proteome of *S. brasiliensis* 5110 (ATCC MYA 4823). The fungus proteins were fractionated using 7 cm pH 3–10 (left to right) strips in the first dimension and 12% SDS-PAGE gels in the second dimension, the spots recognized by western blot with sera from mice infected by *S. brasiliensis*. (B) The total spots of the gel surrounded borders by a black line in the ImageMaster 2D Platinum 7.0 (GE Healthcare). (C) Until 50kDa spots of the gel, where is the most spots number, surrounded borders by a black line in the ImageMaster 2D Platinum 7.0 (GE Healthcare).
